# Supplementary material for: Using a Mobile Social Networking App to Promote Physical Activity: A Qualitative Study of Users’ Perspectives
Source: PubMed Central journal article supplement (PMC6320410; doi:10.2196/11439), 2018-12-21
Supplement: jmir_v20i12e11439_app1.pdf [file jmir_v20i12e11439_app1.pdf]

**Appendix 1: Consolidated criteria for reporting qualitative studies (COREQ): 32-item checklist**

Developed from:

Tong A, Sainsbury P, Craig J. Consolidated criteria for reporting qualitative research (COREQ): a 32-item checklist for interviews and focus groups. *International Journal for Quality in Health Care*. 2007. Volume 19, Number 6: pp. 349 – 357

| No. Item                                       | Guide questions/description                                                                                                               | Reported on Section                                                                                                                                                                      |
|------------------------------------------------|-------------------------------------------------------------------------------------------------------------------------------------------|------------------------------------------------------------------------------------------------------------------------------------------------------------------------------------------|
| <b>Domain 1: Research team and reflexivity</b> |                                                                                                                                           |                                                                                                                                                                                          |
| <i>Personal Characteristics</i>                |                                                                                                                                           |                                                                                                                                                                                          |
| 1. Interviewer/facilitator                     | Which author/s conducted the interview or focus group?                                                                                    | Authors' Contributions                                                                                                                                                                   |
| 2. Credentials                                 | What were the researcher's credentials? E.g. PhD, MD                                                                                      | Authors' names and titles                                                                                                                                                                |
| 3. Occupation                                  | What was their occupation at the time of the study?                                                                                       | Authors' affiliation                                                                                                                                                                     |
| 4. Gender                                      | Was the researcher male or female?                                                                                                        | Authors' names and titles                                                                                                                                                                |
| 5. Experience and training                     | What experience or training did the researcher have?                                                                                      | Authors' names and titles, Methods/Interview Procedure section                                                                                                                           |
| <i>Relationship with participants</i>          |                                                                                                                                           |                                                                                                                                                                                          |
| 6. Relationship established                    | Was a relationship established prior to study commencement?                                                                               | No                                                                                                                                                                                       |
| 7. Participant knowledge of the interviewer    | What did the participants know about the researcher? e.g. personal goals, reasons for doing the research                                  | Reasons for doing research - Methods/Interview Procedure section                                                                                                                         |
| 8. Interviewer characteristics                 | What characteristics were reported about the interviewer/facilitator? e.g. Bias, assumptions, reasons and interests in the research topic | All the authors had a positive attitude towards mobile health technologies and online social networks, but the authors strived to remain neutral in the conversations with participants. |

|                                          |                                                                                                                                                          |                                                          |
|------------------------------------------|----------------------------------------------------------------------------------------------------------------------------------------------------------|----------------------------------------------------------|
| <b>Domain 2: study design</b>            |                                                                                                                                                          |                                                          |
| <i>Theoretical framework</i>             |                                                                                                                                                          |                                                          |
| 9. Methodological orientation and Theory | What methodological orientation was stated to underpin the study? e.g. grounded theory, discourse analysis, ethnography, phenomenology, content analysis | Thematic analysis – Methods/Data Management and Analysis |
| <i>Participant selection</i>             |                                                                                                                                                          |                                                          |
| 10. Sampling                             | How were participants selected? e.g. purposive, convenience, consecutive, snowball                                                                       | Purposive – Methods/Study Setting and Participants       |
| 11. Method of approach                   | How were participants approached? e.g. face-to-face, telephone, mail, email                                                                              | Methods/Study Setting and Participants                   |
| 12. Sample size                          | How many participants were in the study?                                                                                                                 | Methods/Study Setting and Participants                   |
| 13. Non-participation                    | How many people refused to participate or dropped out? Reasons?                                                                                          | Methods/Study Setting and Participants                   |
| <i>Setting</i>                           |                                                                                                                                                          |                                                          |
| 14. Setting of data collection           | Where was the data collected? e.g. home, clinic, workplace                                                                                               | Methods/Interview Procedure section                      |
| 15. Presence of non-participants         | Was anyone else present besides the participants and researchers?                                                                                        | No                                                       |
| 16. Description of sample                | What are the important characteristics of the sample? e.g. demographic data, date                                                                        | Table 2                                                  |
| <i>Data collection</i>                   |                                                                                                                                                          |                                                          |
| 17. Interview guide                      | Were questions, prompts, guides provided by the authors? Was it pilot tested?                                                                            | Methods/Interview Procedure section                      |
| 18. Repeat interviews                    | Were repeat interviews carried out? If yes, how many?                                                                                                    | Methods/Interview Procedure section                      |
| 19. Audio/visual recording               | Did the research use audio or visual recording to collect the data?                                                                                      | Audio                                                    |
| 20. Field notes                          | Were field notes made during and/or after the inter view or focus group?                                                                                 | Methods/Interview Procedure section                      |

|                                        |                                                                                                                                 |                                                              |
|----------------------------------------|---------------------------------------------------------------------------------------------------------------------------------|--------------------------------------------------------------|
| 21. Duration                           | What was the duration of the interviews or focus group?                                                                         | Methods/Interview Procedure section                          |
| 22. Data saturation                    | Was data saturation discussed?                                                                                                  | Methods/Interview Procedure section                          |
| 23. Transcripts returned               | Were transcripts returned to participants for comment and/or correction?                                                        | No                                                           |
| <b>Domain 3: analysis and findings</b> |                                                                                                                                 |                                                              |
| <i>Data analysis</i>                   |                                                                                                                                 |                                                              |
| 24. Number of data coders              | How many data coders coded the data?                                                                                            | Methods/Data Management and Analysis                         |
| 25. Description of the coding tree     | Did authors provide a description of the coding tree?                                                                           | N/A                                                          |
| 26. Derivation of themes               | Were themes identified in advance or derived from the data?                                                                     | Methods/Data Management and Analysis                         |
| 27. Software                           | What software, if applicable, was used to manage the data?                                                                      | Methods/Data Management and Analysis                         |
| 28. Participant checking               | Did participants provide feedback on the findings?                                                                              | No                                                           |
| <i>Reporting</i>                       |                                                                                                                                 |                                                              |
| 29. Quotations presented               | Were participant quotations presented to illustrate the themes/findings? Was each quotation identified? e.g. participant number | Textboxes 1, 2, 3                                            |
| 30. Data and findings consistent       | Was there consistency between the data presented and the findings?                                                              | Yes, there was.<br>Results & Discussion                      |
| 31. Clarity of major themes            | Were major themes clearly presented in the findings?                                                                            | Yes, they were.<br>Results & Discussion                      |
| 32. Clarity of minor themes            | Is there a description of diverse cases or discussion of minor themes?                                                          | Discussion of major and minor themes<br>Results & Discussion |
