# Supplementary material for: Using a Mobile Social Networking App to Promote Physical Activity: A Qualitative Study of Users’ Perspectives
Source: PubMed Central journal article supplement (PMC6320410; doi:10.2196/11439), 2018-12-21
Supplement: jmir_v20i12e11439_app2.pdf [file jmir_v20i12e11439_app2.pdf]

## Appendix 2: Screenshots of the fit.healthy.me app

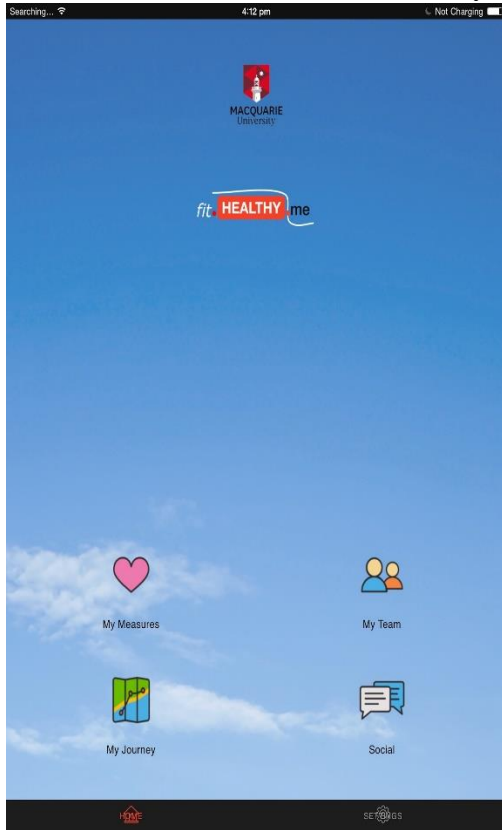

a) Homepage

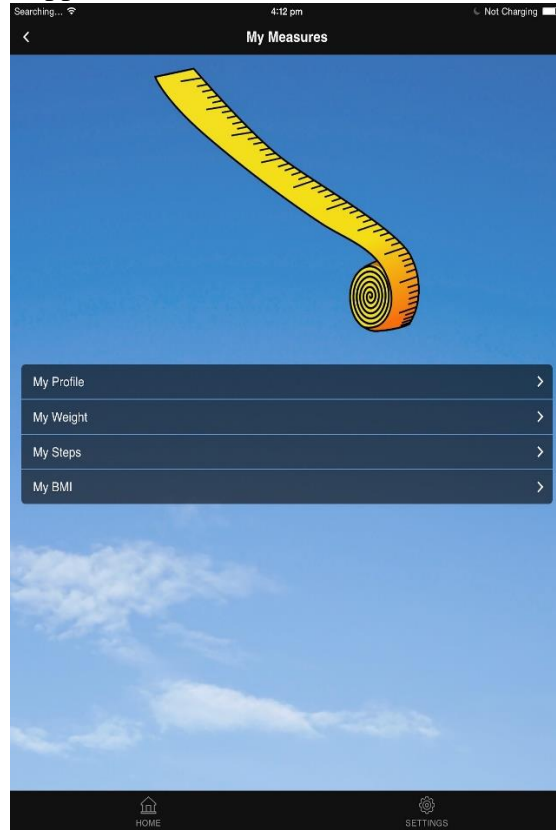

b) My measures

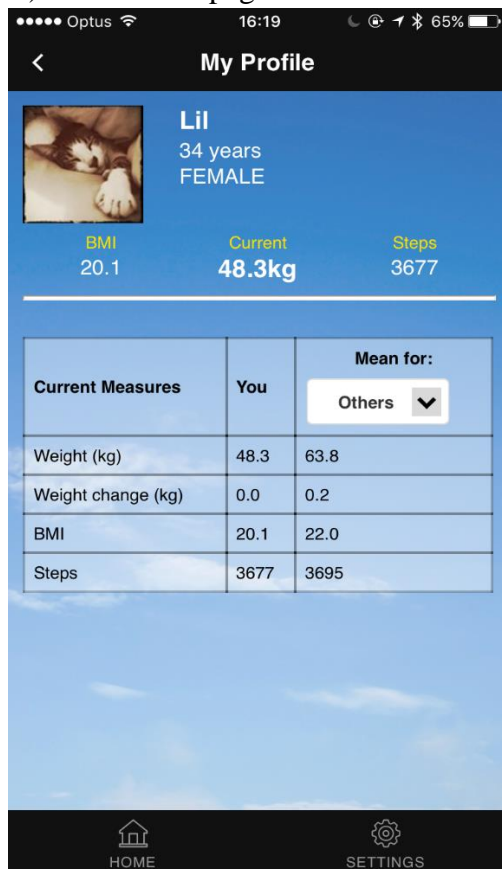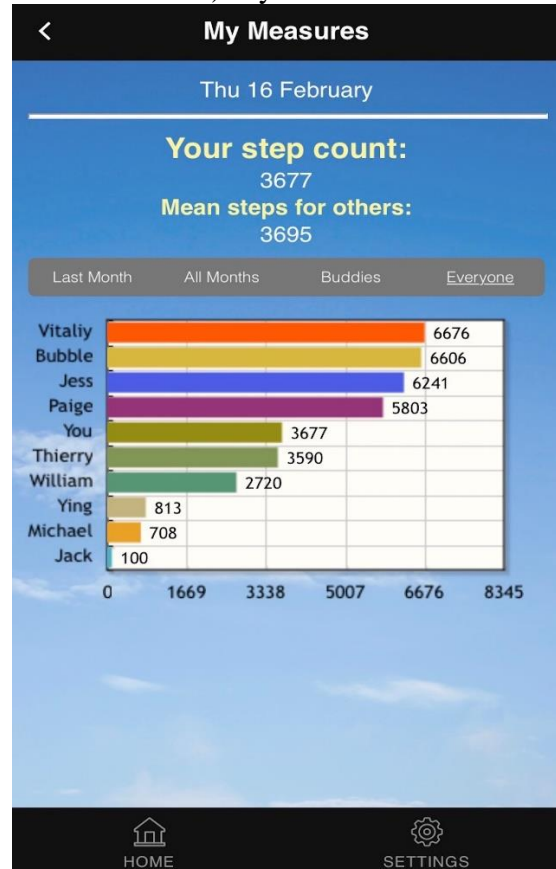

c) Social comparison features
