# Supplementary material for: Using a Mobile Social Networking App to Promote Physical Activity: A Qualitative Study of Users’ Perspectives
Source: PubMed Central journal article supplement (PMC6320410; doi:10.2196/11439), 2018-12-21
Supplement: jmir_v20i12e11439_app3.pdf [file jmir_v20i12e11439_app3.pdf]

## **Appendix 3. Interview guides at pre-intervention sessions and post-intervention sessions**

### **Pre-intervention sessions**

#### **1. Physical activity**

- a. What helps you to exercise regularly?
- b. What prevents you from exercising regularly?

#### **2. Weight management**

- a. What helps you to maintain a healthy weight?
- b. What prevents you from maintaining a healthy weight?

#### **3. Wearable devices**

- a. What do you think are possible advantages of monitoring physical activity and weight? What are the disadvantages?
- b. Are you using, or have you used in the past, any wearable/tracking devices to monitor your physical activity and weight? If yes, which ones?
- c. What do you think are possible advantages of using wearable/tracking devices to monitor your health? And disadvantages?

#### **4. Mobile apps**

- a. Do you use, or have you used in the past, any mobile apps to monitor your health or to track lifestyle/fitness activities? If yes, which ones?
- b. What do you think are possible advantages of using a mobile app to monitor your health? And disadvantages?

#### **5. Social features**

- a. Do you use any social networking sites? Have you ever used social networking sites for health purposes? (e.g. search health information, participate in fitness or health-related groups)
- b. What do you think are possible advantages of using social network features to facilitate weight management and physical activity? And disadvantages?

#### **6. Is there any comment you want to make?**

## **Post-intervention sessions**

1. How did you find the experience of participating in the study?
2. **Wearable devices**
  - a. What were the benefits of using the wearable device to monitor your activity and weight?
  - b. What were the disadvantages of using the wearable device to monitor your physical activity and weight? Prompts: ease-of-use; convenience; integration in daily routine
  - c. In your previous interview, you mentioned that ... Has your opinion about the wearable device changed after using it?
  - d. What device (Fitbit tracker/scale) do you choose to keep? Why?
3. **Health apps**
  - a. What were the benefits of using the fit.healthy.me app to monitor your physical activity and weight?
  - b. What were the disadvantages of using the fit.Healthy.me app?
  - c. In your previous interview, you mentioned that ... Has your opinion about using the app changed after using it?
4. **Social features**
  - a. What were the benefits of the social components in this intervention? (Prompts: tables, graphs to compare yourself, the social forum)
  - b. What were the disadvantages of the social components?
  - c. In your previous interview, you mentioned that ... Has your opinion about using social media to help physical activity and weight management changed after using it?
  - d. Did you have any social connections with other people who are in the study? (Did you know them before or after the study?)
5. **Suggestion:**
  - a. **Keep using:** We noticed that you were really engaged with the study (using the app, scale and tracker). What helped you to be so engaged?

OR

- b. Stop using:** We noticed that you stopped using the app/tracker after [X months].  
Why did you stop? What could we have done to help you stay engaged?
- c.** Do you have **any suggestions** about additional aspects of the app or the devices that could be helpful in terms of monitoring activity and weight?
